# Supplementary material for: Chronic Chemogenetic Activation of the Superior Colliculus in Glaucomatous Mice: Local and Retrograde Molecular Signature
Source: MDPI journal article supplement (doi:10.3390/cells11111784), 2022-05-29
Supplement: s1 [file s1]

Article

# Chronic Chemogenetic Activation of the Superior Colliculus in Glaucomatous Mice: Local and Retrograde Molecular Signature

Marie Claes <sup>1</sup>, Emiel Geeraerts <sup>1</sup>, Stéphane Plaisance <sup>2</sup>, Stephanie Mentens <sup>1,3,4</sup>, Chris Van den Haute <sup>5,6</sup>, Lies De Groef <sup>3</sup>, Lut Arckens <sup>4</sup> and Lieve Moons <sup>1,\*</sup>

- <sup>1</sup> Neural Circuit Development and Regeneration Research Group, Department of Biology, KU Leuven, Leuven Brain Institute, 3000 Leuven, Belgium; marie.claes@kuleuven.be (M.C.); emiel\_geeraerts@hotmail.com (E.G.); stephanie.mentens@kuleuven.be (S.M.)
- <sup>2</sup> VIB Nucleomics core, 3000 Leuven, Belgium; stephane.plaisance@vib.be
- <sup>3</sup> Cellular Communication and Neurodegeneration Research Group, Department of Biology, KU Leuven, Leuven Brain Institute, 3000 Leuven, Belgium; lies.degroef@kuleuven.be
- <sup>4</sup> Neuroplasticity and Neuroproteomics Research Group, Department of Biology, KU Leuven, Leuven Brain Institute, 3000 Leuven, Belgium; lut.arckens@kuleuven.be
- <sup>5</sup> Neurobiology and Gene Therapy Research Group, Department of Neurosciences, KU Leuven, Leuven Brain Institute, 3000 Leuven, Belgium; chris.vandenhaut@kuleuven.be
- <sup>6</sup> KU Leuven Viral Vector Core, 3000 Leuven, Belgium
- \* Correspondence: lieve.moons@kuleuven.be

## Supplementary information

**Table S1.** Mean values  $\pm$  SEM for the different techniques used to probe glaucomatous induction (i.e. IOP and anterior chamber depth) and neuro-protection (i.e. pSTR recordings), corresponding to Figure 9a-c.

| Experimental group                | Mean $\pm$ SEM     |
|-----------------------------------|--------------------|
| IOP (area under the curve)        |                    |
| SHAM                              | 26.84 $\pm$ 0.53   |
| DREADD                            | 27.36 $\pm$ 0.45   |
| OHT                               | 34.97 $\pm$ 0.93   |
| OHT + DREADD                      | 33.68 $\pm$ 1.00   |
| Anterior chamber depth ( $\mu$ m) |                    |
| SHAM                              | 388.87 $\pm$ 2.48  |
| DREADD                            | 385.11 $\pm$ 3.28  |
| OHT                               | 472.22 $\pm$ 9.91  |
| OHT + DREADD                      | 472.04 $\pm$ 10.62 |
| pSTR ( $\mu$ V)                   |                    |
| SHAM                              | 160.79 $\pm$ 5.61  |
| DREADD                            | 170.74 $\pm$ 5.22  |
| OHT                               | 129.90 $\pm$ 5.94  |
| OHT + DREADD                      | 121.83 $\pm$ 4.63  |

**Table S2.** Estimation statistics (Hedges' g values with corresponding confidence intervals) for the different techniques used to probe glaucomatous induction (i.e. IOP and anterior chamber depth) and neuroprotection (i.e. pSTR recordings), corresponding to Figure 9a-c.

| Comparison             | Unpaired Hedges' g | 95% Confidence interval |
|------------------------|--------------------|-------------------------|
| IOP                    |                    |                         |
| SHAM VS. DREADD        | 0.18               | [-0.31, 0.67]           |
| SHAM VS. OHT           | 1.75               | [1.24, 2.23]            |
| SHAM VS. OHT + DREADD  | 1.42               | [0.92, 1.87]            |
| ANTERIOR CHAMBER DEPTH |                    |                         |
| SHAM VS. DREADD        | -0.22              | [-0.74, 0.26]           |
| SHAM VS. OHT           | 1.87               | [1.45, 2.28]            |
| SHAM VS. OHT + DREADD  | 1.78               | [1.28, 2.37]            |
| pSTR                   |                    |                         |
| SHAM VS. DREADD        | 0.32               | [-0.16, 0.83]           |
| SHAM VS. OHT           | -0.92              | [-1.4, -0.43]           |
| SHAM VS. OHT + DREADD  | -1.32              | [-1.8, -0.81]           |
